# Supplementary material for: Conformational change in the thiazole and oxazoline containing cyclic octapeptides, the patellamides. Part 2. Solvent dependent conformational changeElectronic supplementary information (ESI) available: further calculational details. See http://www.rsc.org/suppdata/p2/b2/b201824c/
Source: Royal Society of Chemistry journal article supplement (doi:10.1039/b201824c), 2002-04-24
Supplement: b201824c.doc [file b201824c.doc]

# Supplementary data

**“Conformational Change in the Thiazole and Oxazoline Containing Cyclic Octapeptides, the Patellamides. Part II: Solvent Dependent Conformational Change.”**

Bruce F. Milne, Linda A. Morris, Marcel Jaspars and Gary S. Thompson

**Calculation of structures**

NOEs were obtained using a T-ROESY pulse sequence with a 400 ms mixing time. NOE’s were classified into weak (1.8 - 5.0 Å), medium (1.8 - 3.5 Å) and strong (1.8 - 2.5 Å) categories. Molecular dynamics calculation were carried out using XPLOR 3.8511, modified for swapping of prochiral groups. Throughout the calculations a forcefield with purely repulsive non bonded interaction terms (REPEL) was used, with no electrostatic potential being applied. The incorporation of the cyclic amino acids Xxx(Thz) and Yyy(Oxn) and the closure of the ring was achieved by a series of patches to the standard XPLOR parameter and topology files for NMR structures. These patches included improper terms to keep the thiazole residue flat. Circular template structures with good geometry were defined, annealed at 300 K, minimised, and checked for the correct chirality and the geometry of the residues1. These template structures were then used in the structure calculations.

Structure calculation used an *ab initio* simulated annealing strategy (YASAP 3.02,3. Sum averaging4 was used for all methyl, methylene, and aromatic ring atom pairs. Assignment of prochiral groups was achieved by floating assignment and swapping of prochiral groups5,6. A reduced set of non-bonded interactions and a reduced representation of the amino acid side chains was used during the conformation search phase7. During all stages of the simulated annealing calculation the temperature was maintained by coupling to a heat bath8 with a coupling frequency of 10 ps-1. 100 initial starting structures were calculated by randomisation of the backbone  and  angles using an elastic bond between 8 Ser C and 1 Val N to relieve strain. The simulated annealing protocol was divided into four stages:

1. 60 ms of annealing at a temperature of 2000 K with a timestep of 2 fs during which the force constants for the distance restraints were increased to their final value in 5 steps. This stage of the calculation used the reduced sidechain representation consisting of a 2.25 Å radius C atom.

2. cooling from 2000 to 1000 K over 40 ps during which force constants for non bonded interactions were increased to their final value.

3. cooling from 1000K to 100 K over 20 ps with a time step of 1 fs.

4. 200 steps of minimisation.

In all cases the lengths of restraints for methyl residues was extended by 0.5 Å to allow for the differential relaxation of methyls. A soft potential was used in the *ab initio* simulated annealing protocol for the distance restraints.

During the refinement stage the 40 and 52 lowest energy structures from each ensemble of patellamide C and patellamide A respectively were refined by a single round of simulated annealing with slow cooling. The high temperature step consisted of 600 ps of cooling from 1500 K to 100 K with a timestep of 3 fs followed 4000 rounds of minimisation. A square well potential was used for the distance restraint function. A cluster of 22 lowest energy structures with the same backbone were selected to represent the final conformation of patellamide A. A cluster of 14 lowest energy structures with the same backbone were selected to calculate statistics for patellamide C.

Calculations were carried out on a SGI Origin2000 computer. The overlay and display of structures was achieved using Molmol.9.

**Restraints used for NOE restrained structure calculation of patellamide A in CDCl3.**

**Structure numbering**

| resid | atom | resid | atom | NOE (w, m, s) |
| --- | --- | --- | --- | --- |
| 7 | HN | 5 or 1 | HA | s |
| 3 | HN | 1 or 5 | HA | m |
| 7 or 3 | HN | 8 | HB# | s |
| 8 | HB# | 1 or 5 | HN | m |
| 4 | HB | 5or 1 | HN | m |
| 5 or 1 | HN | 3 | HA | m |
| 7 or 3 | HN | 8 | HA | m |
| 5 or 1 | HB | 7 | HN | m |
| 1 or 5 | HB | 3 | HN | m |
| 1 or 5 | HB | 2 | HB1 | w |
| 5 or 1 | HB | 6 | HB1 | w |
| 1 or 5 | HN | 7 | HB | m |
| 5 or 1 | HN | 3 | HB | m |
| 5 or 1 | HN | 5 | HG## | m |
| 1 or 5 | HN | 1 | HG## | m |
| 2 or 6 | HB1 | 1 | HG## | m |
| 6 or 2 | HB1 | 5 | HG## | m |
| 3 or 7 | HN | 1 | HG## | m |
| 7 or 3 | HN | 5 | HG## | m |
| 3 or 7 | HN | 3 | HG2# | w |
| 7 or 3 | HN | 7 | HG2# | w |
| 1 or 5 | HB | 1 | HA | s |
| 5 or 1 | HB | 5 | HA | s |
| 8 | HB# | 7 or 3 | HB | s |
| 4 or 8 | HA | 4 | HG2# | s |
| 4 | HB | 4 | HG2# | s |
| 8 | HB# | 1 or 5 | HG## | m |
| 1 or 5 | HA | 1 | HG## | s |
| 5 or 1 | HA | 5 | HG## | s |
| 8 | HB# | 7 or 3 | HG2# | m |

Energies for patellamide A minimum energy conformation:

| ETotal | EBonds | EAngles | EImproper | Evan der Waals | ENOE |
| --- | --- | --- | --- | --- | --- |
| 11.82 | 1.69 | 9.22 | 0.87 | 6.15 x 10-5 | 4.19 x 10-2 |

**No NOE violations**

**Statistics for patellamide A (22 lowest energy structures)**

Mean global backbone RMSD: 0.22 ± 0.14 Å

Mean global heavy atom RMSD: 0.55 ± 0.22 Å

|  | Average global displacements | | | Average local RMSDs | Average local displacements | | |
| --- | --- | --- | --- | --- | --- | --- | --- |
| Res #  Name | BB | Heavy | Heavysc | BB | BB | Heavy | Heavysc |
| 1 Val | 0.12 | 0.18 | 0.22 | 0.00 | 0.00 | 0.00 | 0.00 |
| 2 Cys | 0.16 | 0.20 | 0.22 | 0.07 | 0.04 | 0.07 | 0.09 |
| 3 Ile | 0.22 | 0.70 | 0.90 | 0.11 | 0.08 | 0.45 | 0.58 |
| 4 Thr | 0.25 | 0.41 | 0.50 | 0.09 | 0.07 | 0.15 | 0.19 |
| 5 Val | 0.11 | 0.15 | 0.19 | 0.09 | 0.05 | 0.07 | 0.08 |
| 6 Cys | 0.12 | 0.15 | 0.16 | 0.04 | 0.02 | 0.04 | 0.06 |
| 7 Ile | 0.15 | 0.60 | 0.78 | 0.08 | 0.06 | 0.49 | 0.65 |
| 8 Ser | 0.13 | 0.18 | 0.26 | 0.00 | 0.00 | 0.00 | 0.00 |

**Restraints used for NOE restrained structure calculation of patellamide C in CDCl3.**

**Structure numbering**

| resid | atom | resid | atom | NOE (w, m, s) |
| --- | --- | --- | --- | --- |
| 1 | HN | 1 | HA | m |
| 3 | HN | 8 | HB | w |
| 1 | HN | 7 | HA | w |
| 3 | HN | 3 | HA | w |
| 1 | HN | 8 | HA | w |
| 1 | HN | 1 | HB1 | m |
| 1 | HN | 1 | HB2 | w |
| 3 | HN | 3 | HB | m |
| 3 | HN | 3 | HG2# | w |
| 5 | HN | 5 | HA | m |
| 7 | HN | 4 | HB | w |
| 7 | HN | 7 | HA | m |
| 5 | HN | 3 | HA | w |
| 5 | HN | 4 | HA | w |
| 7 | HN | 7 | HB | m |
| 5 | HN | 5 | HB# | m |
| 7 | HN | 7 | HG12 | w |
| 6 | HB1 | 1 | HB1 | m |
| 6 | HB1 | 1 | HB2 | m |
| 2 | HB1 | 5 | HB# | m |
| 1 | HD# | 1 | HA | w |
| 1 | HD# | 5 | HA | w |
| 1 | HD# | 7 | HA | w |
| 1 | HD# | 1 | HB1 | w |
| 1 | HD# | 1 | HB2 | w |
| 1 | HE# | 1 | HA | w |
| 1 | HE# | 1 | HB2 | w |
| 4 | HA | 4 | HB | m |
| 8 | HA | 8 | HB | m |
| 1 | HA | 1 | HB1 | m |
| 1 | HA | 1 | HB2 | m |
| 1 | HB1 | 1 | HB2 | s |
| 3 | HB | 3 | HA | m |
| 3 | HB | 8 | HB | w |
| 7 | HB | 7 | HA | m |
| 7 | HB | 4 | HB | w |
| 5 | HA | 5 | HB# | s |
| 7 | HG11 | 7 | HA | m |
| 7 | HG11 | 4 | HB | w |
| 4 | HG2# | 4 | HA | s |
| 4 | HG2# | 4 | HB | s |
| 8 | HG2# | 8 | HA | s |
| 8 | HG2# | 8 | HB | s |
| 7 | HG12 | 7 | HA | m |
| 3 | HG2# | 4 | HA | w |
| 3 | HG2# | 3 | HA | s |
| 3 | HG2# | 8 | HB | m |
| 7 | HG2# | 8 | HA | w |
| 7 | HG2# | 7 | HA | s |
| 7 | HD1# | 7 | HA | m |
| 7 | HD1# | 4 | HB | w |
| 7 | HB | 7 | HG11 | m |
| 7 | HB | 7 | HG12 | m |
| 7 | HB | 7 | HG2# | m |
| 7 | HB | 7 | HD1# | m |
| 3 | HB | 8 | HG2# | m |
| 3 | HB | 3 | HG2# | m |
| 7 | HG11 | 8 | HG2# | w |
| 7 | HG11 | 7 | HG2# | m |
| 7 | HG11 | 7 | HD1# | m |
| 8 | HG2# | 3 | HG2# | m |
| 7 | HG12 | 7 | HG2# | m |
| 4 | HG2# | 7 | HD1# | m |

Energies for patellamide C minimum energy conformation:

| ETotal | EBonds | EAngles | EImproper | Evan der Waals | ENOE |
| --- | --- | --- | --- | --- | --- |
| 37.3311 | 3.23041 | 19.0393 | 4.9251 | 3.78779 | 6.3485 |

NOE Violations:

| Restraint | Actual distance (Å) | Restraint distance (Å) | ENOE |
| --- | --- | --- | --- |
| 6 CYS HB1 - 1 PHE HB1 | 3.649 | 3.50 | 1.110 |
| 1 PHE HD# - 7 ILE HA | 5.278 | 5.00 | 3.852 |
| 1 PHE HE# - 1 PHE HA | 5.114 | 5.00 | 0.646 |

**Statistics for patellamide C (14 lowest energy structures)**

Mean global backbone RMSD: 0.01 ± 0.00 Å

Mean global heavy atom RMSD: 0.40 ± 0.26 Å

|  | Average global displacements | | | Average local RMSDs | Average local displacements | | |
| --- | --- | --- | --- | --- | --- | --- | --- |
| Res #  Name | BB | Heavy | Heavysc | BB | BB | Heavy | Heavysc |
| 1 PHE | 0.00 | 0.70 | 0.84 | 0.00 | 0.00 | 0.00 | 0.00 |
| 2 CYS | 0.00 | 0.00 | 0.00 | 0.00 | 0.00 | 0.00 | 0.00 |
| 3 VAL | 0.00 | 0.00 | 0.01 | 0.00 | 0.00 | 0.00 | 0.00 |
| 4 THR | 0.01 | 0.01 | 0.01 | 0.00 | 0.00 | 0.01 | 0.00 |
| 5 ALA | 0.00 | 0.00 | 0.00 | 0.00 | 0.00 | 0.00 | 0.00 |
| 6 CYS | 0.00 | 0.00 | 0.00 | 0.00 | 0.00 | 0.00 | 0.00 |
| 7 ILE | 0.00 | 0.27 | 0.36 | 0.00 | 0.00 | 0.27 | 0.35 |
| 8 THR | 0.00 | 0.00 | 0.01 | 0.00 | 0.00 | 0.00 | 0.00 |

**References**

(1) Brünger, A. T. X-PLOR A system for X-ray crystallography and NMR 3..851.; Yale University: New Haven, 1993.

(2) Nilges, M.; Gronenborn, A. M.; Brünger, A. T.; Clore, G. M. *Prot. Engng.* **1988**, *2*, 27-38.

(3) Nilges, M.; Kuszewski, J.; Brünger, A. T. In *Computational Aspects of the Study of Biological Macromolecules by Nuclear Magnetic Resonance*; Hoch, J. C., Poulsen, F. M., Redfield, C., Eds.; Plenum Press: New York, 1991; Vol. Vol 225, pp 451-455.

(4) Brünger, A. T.; Clore, G. M.; Gronenborn, A. M.; Karplus, M. *Proc. Natl. Acad. Sci. U.S.A.* **1986**, *83*, 3801-3805.

(5) Holak, T. A.; Nilges, M.; Oschkinat, H. *FEBS Lett.* **1989**, *242*, 218-224.

(6) Folmer, R. H. A.; Hilbers, C. W.; Konings, R. N. H.; Nilges, M. *J. Biomol NMR* **1997**, *9*, 245-258.

(7) Nilges, M. *Proteins: Struct. Funct. and Genet.* **1993**, *17*, 297-309.

(8) Berendsen, H. J. C.; Postma, J. P. M.; van Gunsteren, W. F.; DiNicola, A.; J.R., H. *J. Chem. Phys.* **1984**,  *81*, 3684-3690.

(9) Koradi, R. M. B.; Wuthrich, K. *J. Mol. Graph.* **1994**, *14*, 51-59.
